# Supplementary material for: Periarticular injection of liposomal bupivacaine in total knee arthroplasty
Source: PubMed Central journal article supplement — Arthroplast Today. 2015 Oct 12;1(4):117–20. doi: 10.1016/j.artd.2015.09.001 (PMC4958110; doi:10.1016/j.artd.2015.09.001), 2015-10-12
Supplement: mmc1.pdf [file mmc1.pdf]

# CONFLICT OF INTEREST STATEMENT

## *Arthroplasty Today*

(Adopted from the American Academy of Orthopaedic Surgeons disclosure statement)

The following form **must be filled out completely and submitted by each author (example, 6 authors, 6 forms). If no discloser is required, please write/type "none" at the end of each sentence.**

Manuscript Title *Peri-Articular Injection of Liposomal Bupivacaine in Total Knee Arthroplasty*

1. Royalties from a company or supplier (The following conflicts were disclosed) *None*
2. Speakers bureau/paid presentations for a company or supplier (The following conflicts were disclosed) *None*
- 3A. Paid employee for a company or supplier (The following conflicts were disclosed) *None*
- 3B. Paid consultant for a company or supplier (The following conflicts were disclosed) *None*
- 3C. Unpaid consultants for a company or supplier (The following conflicts were disclosed) *None*
4. Stock or stock options in a company or supplier (The following conflicts were disclosed) *None*
5. Research support from a company or supplier as a Principal Investigator (The following conflicts were disclosed) *None*
6. Other financial or material support from a company or supplier (The following conflicts were disclosed) *None*
7. Royalties, financial or material support from publishers (The following conflicts were disclosed) *None*
8. Medical/Orthopaedic publications editorial/governing board (The following conflicts were disclosed) *None*
9. Board member/committee appointments for a society (The following conflicts were disclosed) *None*

**Each author must sign AND print or type his/her name, date and submit a separate form**

In addition, one BLINDED Conflict of Interest form (no author names used) should be submitted per manuscript with all author disclosures.

*James Reid Spears*  
Author Name (Print or Type)

*[Signature]*  
Author Signature

*7/7/15*  
Date
