# Supplementary material for: Periarticular injection of liposomal bupivacaine in total knee arthroplasty
Source: PubMed Central journal article supplement — Arthroplast Today. 2015 Oct 12;1(4):117–20. doi: 10.1016/j.artd.2015.09.001 (PMC4958110; doi:10.1016/j.artd.2015.09.001), 2015-10-12
Supplement: mmc3.pdf [file mmc3.pdf]

**CONFLICT OF INTEREST STATEMENT*****Arthroplasty Today***

(Adopted from the American Academy of Orthopaedic Surgeons disclosure statement)

The following form must be filled out completely and submitted by each author (example, 6 authors, 6 forms). If no discloser is required, please write/type "none" at the end of each sentence.

- Manuscript Title *Peri-articular Injection of Liposomal Bupivacaine in Total Knee Arthroplasty*
1. Royalties from a company or supplier (The following conflicts were disclosed)  
*NONE*
  2. Speakers bureau/paid presentations for a company or supplier (The following conflicts were disclosed)  
*NONE*
  - 3A. Paid employee for a company or supplier (The following conflicts were disclosed)  
*NONE*
  - 3B. Paid consultant for a company or supplier (The following conflicts were disclosed)  
*NONE*
  - 3C. Unpaid consultants for a company or supplier (The following conflicts were disclosed)  
*NONE*
  4. Stock or stock options in a company or supplier (The following conflicts were disclosed)  
*NONE*
  5. Research support from a company or supplier as a Principal Investigator (The following conflicts were disclosed)  
*NONE*
  6. Other financial or material support from a company or supplier (The following conflicts were disclosed)  
*NONE*
  7. Royalties, financial or material support from publishers (The following conflicts were disclosed)  
*NONE*
  8. Medical/Orthopaedic publications editorial/governing board (The following conflicts were disclosed)  
*NONE*
  9. Board member/committee appointments for a society (The following conflicts were disclosed)  
*NONE*

Each author must sign AND print or type his/her name, date and submit a separate form

In addition, one BLINDED Conflict of Interest form (no author names used) should be submitted per manuscript with all author disclosures.

*BRADLEY WEBB*  
Author Name (Print or Type)

*[Signature]*  
Author Signature

*7/7/15*  
Date
